# Supplementary material
Source: Springer Nature journal article supplement (https://www.springermedizin.de/resource/supplementary/12957_2008_540_MOESM2_ESM.pdf/9565236)

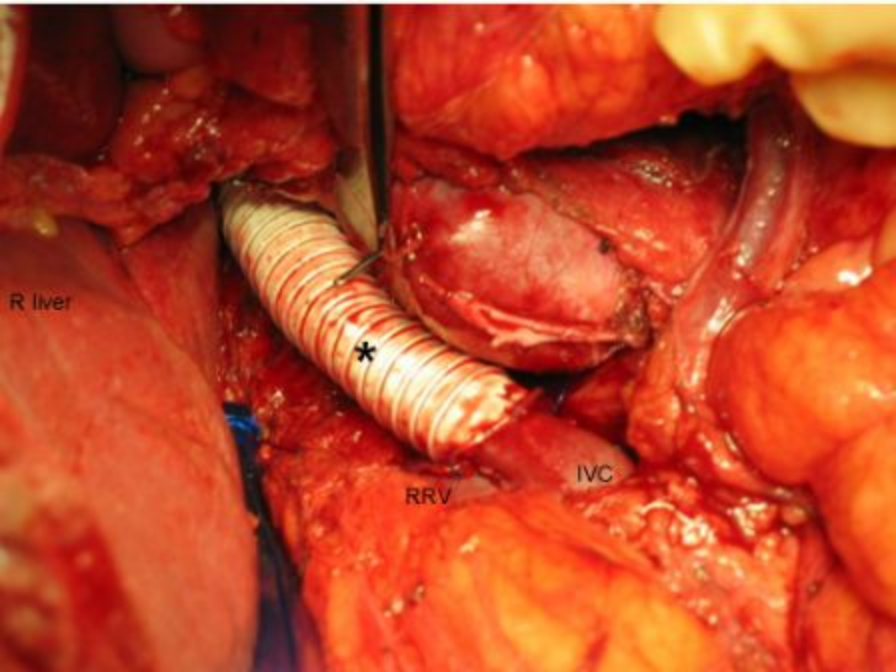

R liver

\*

RRV

IVC

Supplement: MOESM2 [file 9565236]
